# Supplementary material for: Identifying Good Candidates for Active Surveillance of Ductal Carcinoma In Situ: Insights from a Large Neoadjuvant Endocrine Therapy Cohort
Source: PubMed Central journal article supplement (PMC10035518; doi:10.1158/2767-9764.crc-22-0263), 2022-12-07
Supplement: crc-22-0263-s01.pdf [file crc-22-0263-s01.pdf]

Table S1: HER2 Status for Patients who had DCIS at the Time of Surgical Excision

| Block ID                                                                          | DCIS Biopsy |          |                      |                              | Surgery (DCIS) |          |                      |                              |
|-----------------------------------------------------------------------------------|-------------|----------|----------------------|------------------------------|----------------|----------|----------------------|------------------------------|
|                                                                                   | ER + (%)    | PR + (%) | HER2 Status IHC/FISH | Location Laterality/Quadrant | ER + (%)       | PR + (%) | HER2 Status IHC/FISH | Location Laterality/Quadrant |
| <b>HER2 Status Concordance on Core Biopsy or Surgical Resection Specimen</b>      |             |          |                      |                              |                |          |                      |                              |
| HER2 Positive Status Concordant on Core Biopsy and/or Surgical Resection Specimen |             |          |                      |                              |                |          |                      |                              |
| UCSF_002                                                                          | 30          | 50       | No tissue            | Right/ULOQ                   | 95             | 0        | 3+                   | Right/ULOQ                   |
| UCSF_172                                                                          | 0           | 0        | No tissue            | Right/ULOQ                   | 95             | 0        | 3+                   | NA                           |
| UCSF_095                                                                          | 90          | 70       | NA                   | Left/multifocal              | 30             | 0        | 3+                   | NA                           |
| UCSF_159                                                                          | 90          | 50       | NA                   | Left/ULOQ                    | 90             | 90       | 3+                   | NA                           |
| UCSF_041                                                                          | 2           | 1        | 3+                   | Right/UIQ                    |                |          | NA                   | Right/UIQ                    |
| UCSF_178                                                                          | 90          | 0        | 3+                   | Left/Multifocal              |                |          | NA                   | NA                           |
| HER2 Negative Status Concordant on Core Biopsy and Surgical Resection Specimen    |             |          |                      |                              |                |          |                      |                              |
| UCSF_190                                                                          | 90          | 90       | 2+                   | Left/central                 | 99             | 99       | 0                    | NA                           |
| UCSF_081                                                                          | 95          | 85       | 1+                   | Right/ULOQ                   | 90             | 50       | 1+                   | Right/ULOQ                   |
| UCSF_192                                                                          | 99          | 99       | NA                   | Left/ULOQ                    | 90             | 90       | 1+                   | Left/ULOQ                    |
| UCSF_033                                                                          | 98          | 98       | NA                   | Left                         |                |          | 0                    | Left/LOQ                     |
| UCSF_133                                                                          | 0           | 0        | No tissue            | Left/LOQ                     | 80             | 60       | 2+                   | Left/LOQ                     |
| UCSF_104                                                                          | 100         | 2        | NA                   | Right/central                |                |          | 2+                   | bilateral                    |
| UCSF_171                                                                          | 100         | 0        | NA                   | Left/UIQ                     |                |          | NA                   | Left                         |
| UCSF_107                                                                          | 95          | 95       | NA                   | Left/ULOQ                    |                |          | NA                   | Left                         |
| UCSF_083                                                                          | 95          | 0        | 1+                   | Left/ULOQ                    | NA             | NA       | NA                   | Left/ULOQ                    |
