# Supplementary material for: Identifying Good Candidates for Active Surveillance of Ductal Carcinoma In Situ: Insights from a Large Neoadjuvant Endocrine Therapy Cohort
Source: PubMed Central journal article supplement (PMC10035518; doi:10.1158/2767-9764.crc-22-0263), 2022-12-07
Supplement: crc-22-0263-s02.pdf [file crc-22-0263-s02.pdf]

Table S2: HER2 Status for Patients who Continued Active Surveillance without Surgery

| Block ID  | DCIS Biopsy        |                    |                            |                                 |
|-----------|--------------------|--------------------|----------------------------|---------------------------------|
|           | ER +<br>(status/%) | PR +<br>(status/%) | HER2<br>Status<br>IHC/FISH | Location<br>Laterality/Quadrant |
| UCSF_164  | 85                 | 15                 | 3+                         | Right/UOQ                       |
| UCSF_043  | 60                 | 90                 | 2+                         | Left/LIQ                        |
| UCSF_080  | 90                 | 90                 | 2+                         | Left/LOQ                        |
| UCSF_099  | 90                 | 15                 | 2+                         | Left/central                    |
| UCSF_158  | 0                  | 0                  | 2+                         | Left/UOQ                        |
| UCSF_187  | 95                 | 25                 | 2+                         | Left/LIQ                        |
| UCSF_101  | 95                 | 80                 | 2+                         | Left/LIQ                        |
| UCSF_182  | positive           | positive           | 2+                         | Right/LOQ                       |
| UCSF_166  | 100                | 20                 | 0                          | Left/UIQ                        |
| UCSF_195A | 90                 | 20                 | 0                          | Left/UOQ                        |
| UCSF_077  | 95                 | 30                 | 1+                         | Left/UOQ                        |
| UCSF_103  | positive           | positive           | 1+                         | Right/multifocal                |
| UCSF_161  | 95                 | 95                 | 1+                         | Right/LOQ                       |
| UCSF_168  | 100                | 10                 | 1+                         | Right/multifocal                |
| UCSF_169  | 0                  | 0                  | 1+                         | Right/UOQ                       |
| UCSF_173  | 100                | 0                  | 1+                         | Right/central                   |
| UCSF_183  | positive           | positive           | 1+                         | Left/multifocal                 |
| UCSF_184  | positive           | positive           | 1+                         | Right/LOQ                       |
| UCSF_185  | 90                 | 80                 | 1+                         | Right/UIQ                       |
| UCSF_195B | 99                 | 98                 | 1+                         | Right/LOQ                       |
| UCSF_008  | 85                 | 40                 | 1+                         | Left/UIQ                        |
| UCSF_055  | 95                 | 60                 | 1+                         | Right/UOQ                       |
| UCSF_200  | 90                 | 90                 | 0                          | Right/LIQ                       |
| UCS_052A  | 95                 | 0                  | No tissue                  | Left/multifocal                 |
| UCSF_086  | positive           | positive           | No tissue                  | Right/UIQ                       |
| UCSF_160  | positive           | positive           | No tissue                  | Right/LOQ                       |
| UCSF_167  | positive           | positive           | No tissue                  | Left/LOQ                        |
| UCSF_060  | NA                 | NA                 | NA                         | Right/multifocal                |
| UCSF_097  | 90                 | 80                 | NA                         | Right/UOQ                       |
| UCSF_003  | 30                 | 50                 | NA                         | Rght/UOQ                        |
| UCSF_044  | positive           | positive           | NA                         | Right/UIQ                       |
| UCSF_047  | 90                 | 20                 | NA                         | Left/LOQ                        |
| UCSF_163  | positive           | positive           | NA                         | Left/UIQ                        |
| UCSF_186  | positive           | positive           | NA                         | Left                            |
| UCSF_193  | 90                 | 30                 | NA                         | Right/multifocal                |
| UCSF_198  | positive           | positive           | NA                         | Right/LQ                        |
| UCSF_199  | 95                 | 95                 | NA                         | Right/UOQ                       |
| UCSF_201  | 95                 | 80                 | NA                         | Right/UOQ                       |
